# Supplementary material for: A ratiometric fluorescent metal ion indicator based on dansyl labeled poly(N-isopropylacrylamide) responds to a quenching metal ion
Source: Royal Society of Chemistry journal article supplement (doi:10.1039/c1an15479f), 2011-01-01
Supplement: c1an15479f.pdf [file c1an15479f.pdf]

## Electronic Supporting Information (ESI) for

# A ratiometric fluorescent metal ion indicator based on dansyl labeled poly(N-isopropylacrylamide) responds to a quenching metal ion

5  
 Jie Du,<sup>a</sup> Shaojun Yao,<sup>a</sup> W. Rudolf Seitz,<sup>\*a</sup> Nicholas E. Bencivenga,<sup>a</sup> Justin O. Massing,<sup>a</sup> Roy P. Planalp,<sup>a</sup>  
 Randy K. Jackson,<sup>b</sup> Daniel P. Kennedy<sup>b</sup> and Shawn C. Burdette<sup>b</sup>

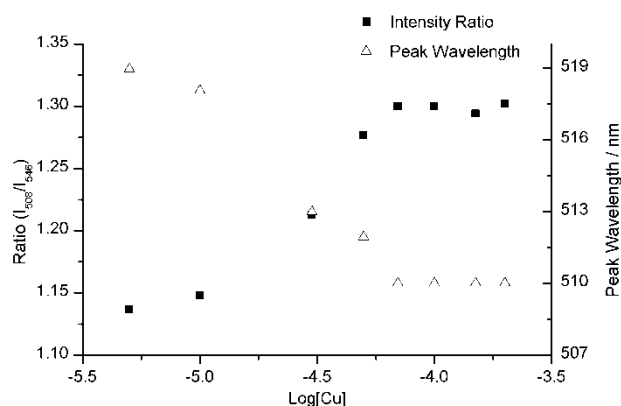

Fig. S1 Calibration curves for spectrofluorometric titration of Cu(II) indicator at 36 °C

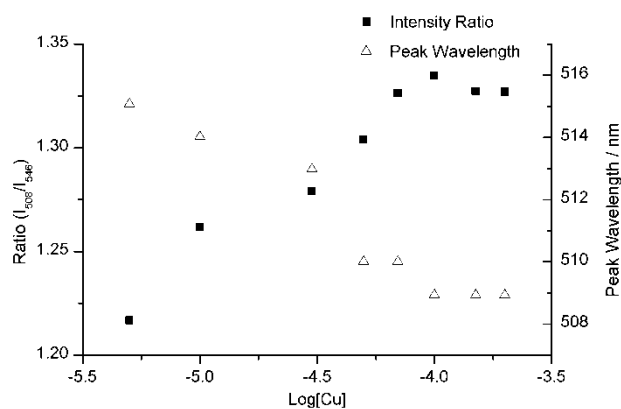

Fig. S2 Calibration curves for spectrofluorometric titration of Cu(II) indicator at 37 °C

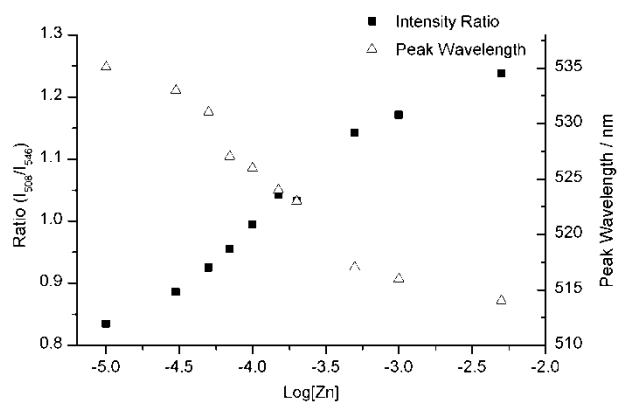

Fig. S3 Calibration curves for spectrofluorometric titration of indicator with Zn(II) at 35 °C

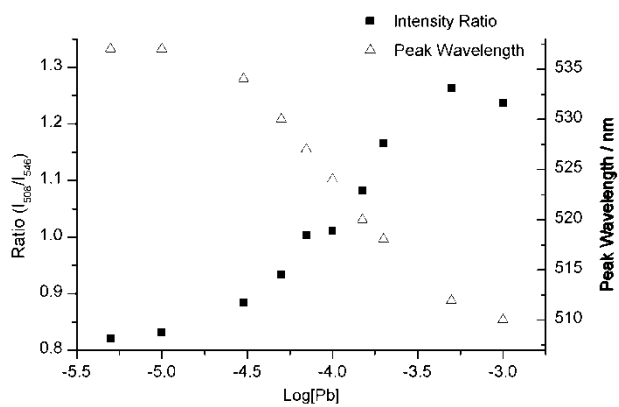

Fig. S4 Calibration curves for spectrofluorometric titration of indicator with Pb(II) at 35 °C
